# Supplementary material for: Deep learning-Based 3D inpainting of brain MR images
Source: PubMed Central journal article supplement (PMC7814079; doi:10.1038/s41598-020-80930-w), 2021-01-18
Supplement: 41598_2020_80930_MOESM1_ESM.pdf [file 41598_2020_80930_MOESM1_ESM.pdf]

## **SUPPLEMENTARY FIGURE LEGENDS**

**SUPPLEMENTARY FIGURE 1.** Gray matter volume difference between U-net and the reference.

**SUPPLEMENTARY FIGURE 2.** Group analysis for gray matter volume among NL, MCI and AD using the U-net output. (a) MCI vs. NL. (b) AD vs. NL.

**SUPPLEMENTARY FIGURE 3.** 3D MRI inpainting for PET finding localization in simultaneous PET/MRI study.

**SUPPLEMENTARY FIGURE 4.** Application of proposed inpainting method to ADNI. Linear interpolation (left) and proposed method (right).

**SUPPLEMENTARY FIGURE 5.** Comparison of the PSNR obtained using the proposed networks trained with a single offset and multiple offsets (1–5).

**SUPPLEMENTARY FIGURE 6.** Difference map between the reference and inpainted image.
