# Supplementary material for: Deep learning-Based 3D inpainting of brain MR images
Source: PubMed Central journal article supplement (PMC7814079; doi:10.1038/s41598-020-80930-w), 2021-01-18
Supplement: 41598_2020_80930_MOESM8_ESM.pdf [file 41598_2020_80930_MOESM8_ESM.pdf]

**SUPPLEMENTARY TABLE 1.** Network details for generator network.

| <b>Layers</b>      | <b>Output size</b> | <b>Number of channels</b> | <b>Convolutional kernels</b> |
|--------------------|--------------------|---------------------------|------------------------------|
| Convolution 1      | 32x32x32           | 32                        | 3x3x3 conv                   |
|                    |                    | 16                        | 1x1x1 conv, 3x3x3 conv       |
|                    |                    | 16                        | 1x1x1 conv, 3x3x3 conv       |
| Dense block 1      | 32x32x32           | 16                        | 1x1x1 conv, 3x3x3 conv       |
|                    |                    | 16                        | 1x1x1 conv, 3x3x3 conv       |
|                    |                    | 16                        | 1x1x1 conv, 3x3x3 conv       |
| Transition layer 1 | 16x16x16           | 16                        | 3x3x3 conv                   |
|                    |                    | 16                        | 1x1x1 conv, 3x3x3 conv       |
|                    |                    | 16                        | 1x1x1 conv, 3x3x3 conv       |
| Dense block 2      | 16x16x16           | 16                        | 1x1x1 conv, 3x3x3 conv       |
|                    |                    | 16                        | 1x1x1 conv, 3x3x3 conv       |
|                    |                    | 16                        | 1x1x1 conv, 3x3x3 conv       |
| Transition layer 2 | 8x8x8              | 16                        | 3x3x3 conv                   |
|                    |                    | 16                        | 1x1x1 conv, 3x3x3 conv       |
|                    |                    | 16                        | 1x1x1 conv, 3x3x3 conv       |
| Dense block 3      | 8x8x8              | 16                        | 1x1x1 conv, 3x3x3 conv       |
|                    |                    | 16                        | 1x1x1 conv, 3x3x3 conv       |
|                    |                    | 16                        | 1x1x1 conv, 3x3x3 conv       |
| Transition layer 1 | 4x4x4              | 16                        | 3x3x3 conv                   |
|                    |                    | 16                        | 1x1x1 conv, 3x3x3 conv       |
|                    |                    | 16                        | 1x1x1 conv, 3x3x3 conv       |
| Dense block 4      | 4x4x4              | 16                        | 1x1x1 conv, 3x3x3 conv       |
|                    |                    | 16                        | 1x1x1 conv, 3x3x3 conv       |
|                    |                    | 16                        | 1x1x1 conv, 3x3x3 conv       |
| Transition layer 3 | 2x2x2              | 16                        | 3x3x3 conv                   |
|                    |                    | 16                        | 1x1x1 conv, 3x3x3 conv       |
|                    |                    | 16                        | 1x1x1 conv, 3x3x3 conv       |
| Dense block 5      | 2x2x2              | 16                        | 1x1x1 conv, 3x3x3 conv       |
|                    |                    | 16                        | 1x1x1 conv, 3x3x3 conv       |
|                    |                    | 16                        | 1x1x1 conv, 3x3x3 conv       |

|                       |          |    |                        |
|-----------------------|----------|----|------------------------|
| Transition up layer 1 | 4x4x4    | 16 | 3x3x3 deconv           |
|                       |          | 16 | 1x1x1 conv, 3x3x3 conv |
|                       |          | 16 | 1x1x1 conv, 3x3x3 conv |
| Dense block 6         | 4x4x4    | 16 | 1x1x1 conv, 3x3x3 conv |
|                       |          | 16 | 1x1x1 conv, 3x3x3 conv |
|                       |          | 16 | 1x1x1 conv, 3x3x3 conv |
| Transition up layer 2 | 8x8x8    | 16 | 3x3x3 deconv           |
|                       |          | 16 | 1x1x1 conv, 3x3x3 conv |
|                       |          | 16 | 1x1x1 conv, 3x3x3 conv |
| Dense block 7         | 8x8x8    | 16 | 1x1x1 conv, 3x3x3 conv |
|                       |          | 16 | 1x1x1 conv, 3x3x3 conv |
|                       |          | 16 | 1x1x1 conv, 3x3x3 conv |
| Transition up layer 3 | 16x16x16 | 16 | 3x3x3 deconv           |
|                       |          | 16 | 1x1x1 conv, 3x3x3 conv |
|                       |          | 16 | 1x1x1 conv, 3x3x3 conv |
| Dense block 8         | 16x16x16 | 16 | 1x1x1 conv, 3x3x3 conv |
|                       |          | 16 | 1x1x1 conv, 3x3x3 conv |
|                       |          | 16 | 1x1x1 conv, 3x3x3 conv |
| Transition up layer 4 | 32x32x32 | 16 | 3x3x3 deconv           |
|                       |          | 16 | 1x1x1 conv, 3x3x3 conv |
|                       |          | 16 | 1x1x1 conv, 3x3x3 conv |
| Dense block 9         | 32x32x32 | 16 | 1x1x1 conv, 3x3x3 conv |
|                       |          | 16 | 1x1x1 conv, 3x3x3 conv |
|                       |          | 16 | 1x1x1 conv, 3x3x3 conv |
| Convolution 2         | 32x32x32 | 1  | 9x9x9 conv             |
